# Supplementary material for: PVBA-UiO-66 using a flexible PVBA with multi-coordination groups as mixed ligands and their super adsorption towards methylene blue
Source: Royal Society of Chemistry journal article supplement (doi:10.1039/c8dt00184g), 2018-01-01
Supplement: c8dt00184g1.pdf [file c8dt00184g1.pdf]

## Supporting Information

### **PVBA-UiO-66 using the flexible PVBA with multi-coordination groups as mixed ligands and their super adsorption towards methylene blue**

*Yongfang Yang,<sup>\*†</sup> Zhanghao Niu,<sup>†</sup> Hua Li,<sup>†</sup> Yehui Ma,<sup>†</sup> Yue Zhang,<sup>\*†</sup> Hefang*

*Wang<sup>\*†</sup>*

**Characterization.** <sup>1</sup>H NMR spectra of 4-VBA and PVBA were recorded on a Varian 300 spectrometer. Fourier transform infrared absorption spectra (FTIR) were recorded on a Bio-Rad FTS 6000 system using diffuse reflectance sampling accessories. The thermal properties of UiO-66 and the PVBA-UiO-66 were measured by thermo gravimetric analysis (TGA). The samples were heated to 800 °C at a heating rate of 10 K/min under pure nitrogen (100 mL/min) gas stream on a SDT Q600. Powder X-ray diffraction (XRD) patterns were characterized using X-ray diffraction (XRD, D/max-2500 with Cu K radiation ( $\lambda=1.5406 \text{ \AA}$ )). Brunauer-Emmett-Teller (BET) surface area of the samples was determined using specific surface and pore properties analyzer (ASAP2020) by the Barrett–Joyner–Halenda (BJH) method. The morphology of UiO-66 and the PVBA-UiO-66 were observed by scanning electronic micrograph (SEM, JEOL JSM-5600). Size exclusion chromatography (SEC) measurements were performed on a system equipped with a Hitachi L-2130 HPLC pump, a Hitachi L-2350 column oven operated at 40 °C, three Varian PL columns with 1000 K-100 K (100,000 Å), 100 K-10 K (10,000 Å), and 100-10 K (1000 Å)

molecular ranges, and a Hitachi L-2490 refractive index detector. THF was used as eluant at a flow rate of 1.0 mL/min. The apparent molecular weight was calculated based on PS standards.

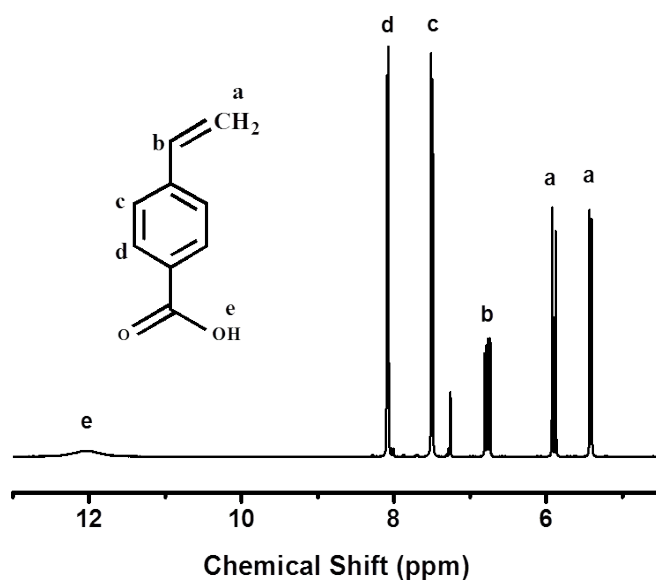

**Figure S1.** <sup>1</sup>H NMR spectrum of 4-VBA.

<sup>1</sup>H NMR spectrum of 4-VBA in CDCl<sub>3</sub> is shown in Fig. S1. <sup>1</sup>H NMR (400 MHz, CDCl<sub>3</sub>) δ (ppm): 12.88 (s, 1H, -COOH), 8.07 (d, 2H, ph-H), 7.52 (d, 2H, ph-H), 6.77 (q, 1H, ph-CHd), 5.91 (d, 1H, dCH), 5.44 (d, 1H, dCH).

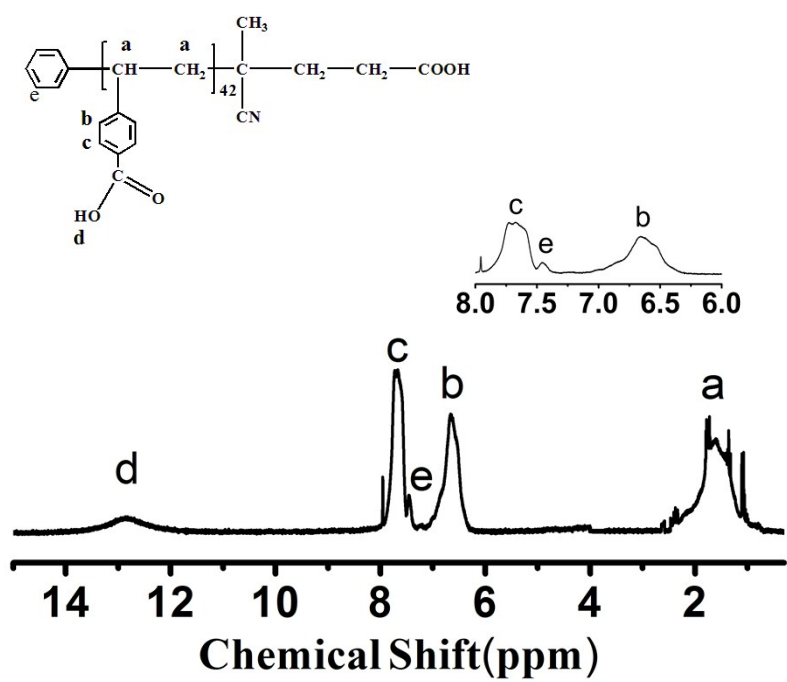

Figure S2. <sup>1</sup>H NMR spectrum of PVBA.

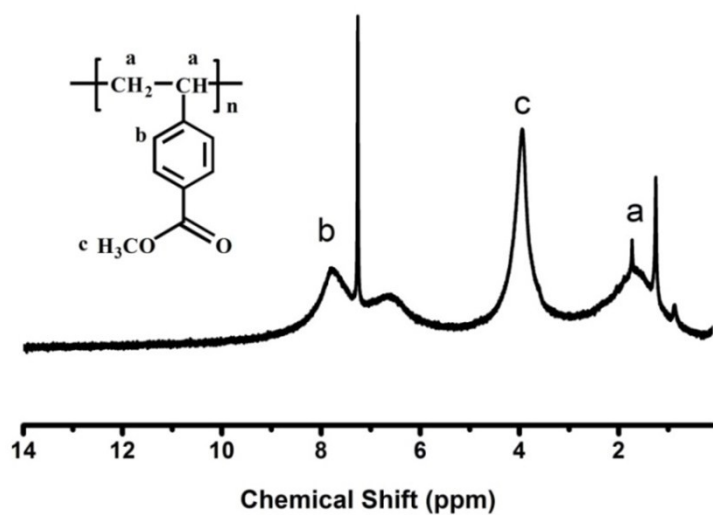

Figure S3. <sup>1</sup>H NMR spectrum of poly(p-vinylbenzoate).

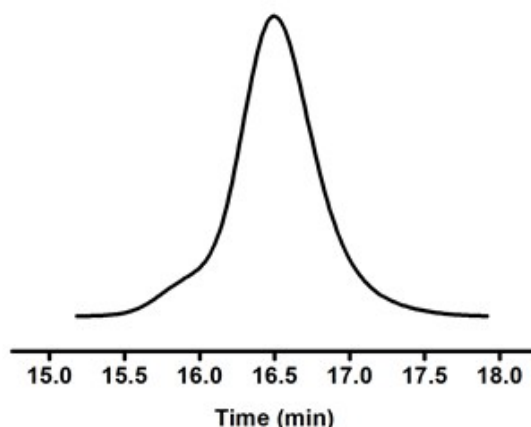

**Figure S4.** GPC spectrum of poly(p-vinylbenzoate).

Poly(p-vinylbenzoate) were synthesized by esterifying PVBA with methanol to determine the molecular weight and the molecular weight distribution of PVBA. The structure of poly(p-vinylbenzoate) was characterized by  $^1\text{H}$  NMR and GPC (Fig. S3 and Fig. S4). No chemical shift at 12.8 ppm which attribute to the hydroxyl protons on the carboxylic acid groups was observed, indicating a complete esterification of PVBA. The molecular weight and the polymer dispersity index of poly(p-vinylbenzoate) homopolymer determined by GPC are about 7.1 K and 1.2, which indicates the molecular weight of PVBA is 6.2 K. This value is consistent with the result obtained from  $^1\text{H}$  NMR.

**Table S1** The carboxyl percentage in PVBA-UiO-66 determined via acid-base titration and TGA results

|                            | PVBA(10%)-<br>UiO-66 | PVBA(26%)-<br>UiO-66 | PVBA(43%)-<br>UiO-66 | PVBA(69%)-<br>UiO-66 | PVBA(100%)-<br>UiO-66 |
|----------------------------|----------------------|----------------------|----------------------|----------------------|-----------------------|
| Acid-base<br>titration (%) | 3.9                  | 6.8                  | 19.8                 | 15.5                 | 16.0                  |
| TGA (%)                    | 4.3                  | 7.0                  | 12.5                 | 9.42                 | 9.95                  |

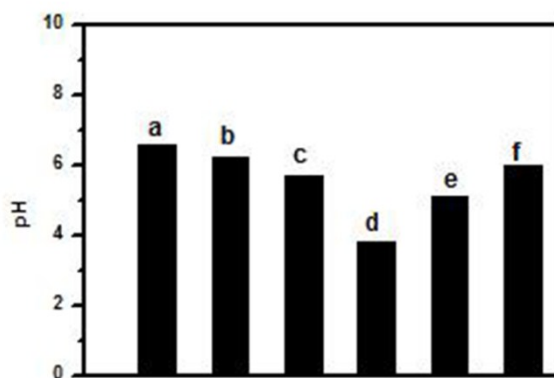

**Figure S5.** The zero-charge point for (a) UiO-66, (b) PVBA(10%)-UiO-66, (c) PVBA(26%)-UiO-66, (d) PVBA(43%)-UiO-66, (e) PVBA(69%)-UiO-66 and (f) PVBA(100%)-UiO-66.

**Table S2** Zr content and Zeta potential of a series of PVBA-UiO-66

| Materials         | Zr content (%) | Zeta potential (mv) |
|-------------------|----------------|---------------------|
| UiO-66            | 14.6           | 31.2                |
| PVBA(10%)-UiO-66  | 19.22          | 9.4                 |
| PVBA(26%)-UiO-66  | 25.85          | 3.2                 |
| PVBA(43%)-UiO-66  | 37.89          | -21.8               |
| PVBA(69%)-UiO-66  | 23.9           | -3.4                |
| PVBA(100%)-UiO-66 | 20.1           | 4.2                 |

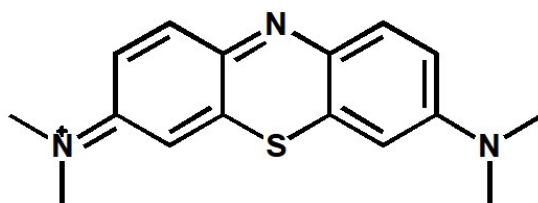

**Figure S6.** The structure of MB.

**Table S3** Adsorption data for MB onto UiO-66 and PVBA(43%)-UiO-66 at various initial concentration of MB (pH = 5.4,  $t_c=180$  min, T=293 K,  $M_{MPCL}=2$  mg)

|                      |       |     |     |      |     |     |
|----------------------|-------|-----|-----|------|-----|-----|
| UiO-66               | $C_e$ | 26  | 56  | 96.4 | 136 | 182 |
|                      | $q_e$ | 120 | 220 | 268  | 340 | 320 |
| PVBA(43%)-<br>UiO-66 | $C_e$ | 8   | 26  | 49   | 73  | 106 |
|                      | $q_e$ | 210 | 370 | 505  | 635 | 720 |

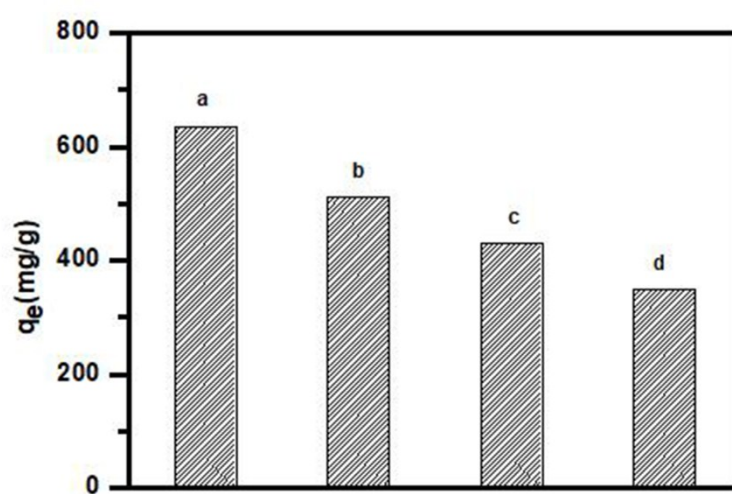

**Figure S7.** Adsorption toward (a) MB, (b) RhB, (c) Sudan III and (d) MO with initial concentration 200 mg/L for PVBA(43%)-UiO-66.

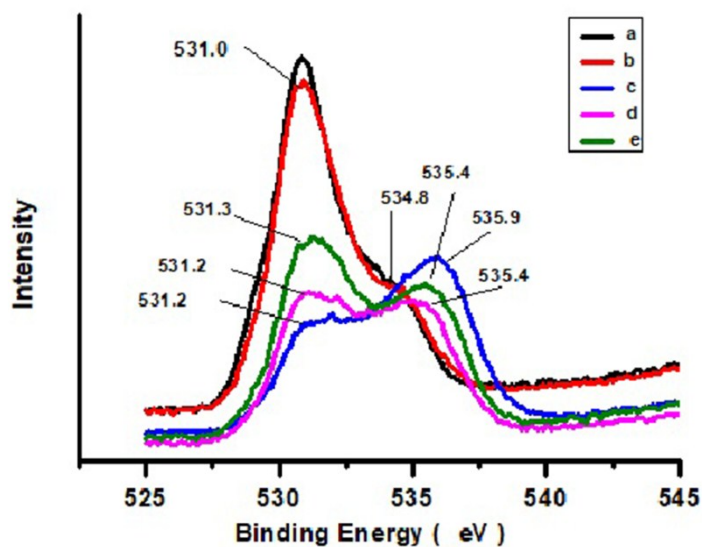

**Figure S8.** XPS spectra for O 1s in (a) PVBA(43%)-UiO-66, (b) PVBA(43%)-UiO-66-MO, (c) PVBA(43%)-UiO-66-sudan III, (d) PVBA(43%)-UiO-66-MB and (e) PVBA(43%)-UiO-66-RhB.

**Table S4** Separation factor for the adsorption of MB onto UiO-66 and PVBA(43%)-UiO-66 in terms of initial concentration of MB (pH = 5.4,  $t_c=180$  min,  $T=293$  K,  $M_{MPCL}=2$  mg)

|                      |       |       |      |      |      |      |
|----------------------|-------|-------|------|------|------|------|
| UiO-66               | $C_e$ | 26    | 56   | 96.4 | 136  | 182  |
|                      | $R_L$ | 0.678 | 0.49 | 0.37 | 0.28 | 0.23 |
| PVBA(43%)-<br>UiO-66 | $C_e$ | 8     | 26   | 49   | 73   | 106  |
|                      | $R_L$ | 0.81  | 0.57 | 0.41 | 0.31 | 0.24 |

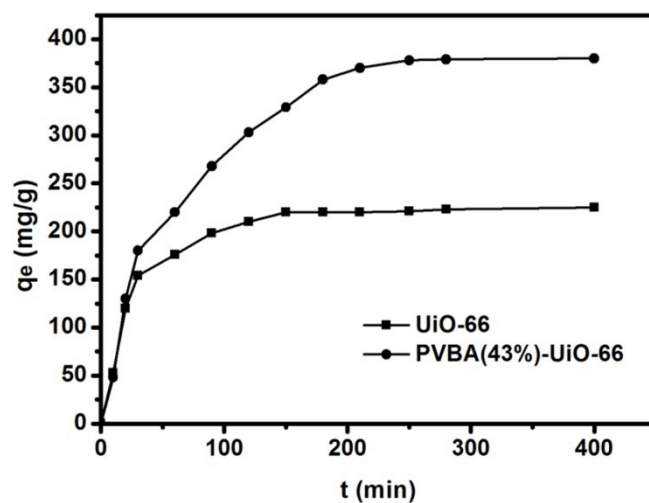

**Figure S9.** Kinetic adsorption data plots of MB onto UiO-66 and PVBA(43%)-UiO-66 (initial concentration of MB: 100 mg/L; adsorbent dose: 0.02 g/L, T=293 K).

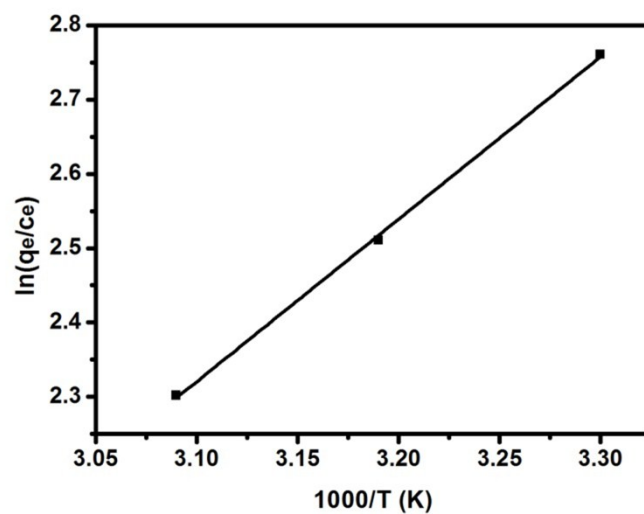

**Figure S10.** Van't Hoff plots for the adsorption of MB onto PVBA(43%)-UiO-66.

( $X_0=30$  mg/L, pH=5.4,  $M_{MPCl}=2$  mg,  $t_c=180$  min).
